# Supplementary material for: A europium(iii)-based metal–organic framework as a naked-eye and fast response luminescence sensor for acetone and ferric iron
Source: Royal Society of Chemistry journal article supplement (doi:10.1039/c6nj02163h), 2016-01-01

## Supporting Information

### **A europium (III)-based metal-organic framework as a naked-eye and fast response luminescence sensor for acetone and ferric iron**

Jian Wang, Jingru Wang, Yang Li, Min Jiang, Lingwen Zhang and Pengyan Wu\*

*School of Chemistry and Chemical Engineering & Jiangsu Key Laboratory of Green Synthetic Chemistry for Functional Materials, Jiangsu Normal University,*

*Xuzhou, Jiangsu, 221116, P. R. China;*

*E-mail: [wpyan@jsnu.edu.cn](mailto:wpyan@jsnu.edu.cn)*

## 1. Materials and Methods.

All chemicals were of reagent grade quality obtained from commercial sources and used without further purification. Biphenyl-2,2'-dicarboxylic acid was purchased from Jinan Henghua Sci. & Tec. Co., Ltd.,  $\text{Eu}(\text{NO}_3)_3 \cdot 6\text{H}_2\text{O}$  was purchased from Alfa Aesar,  $\text{Fe}(\text{NO}_3)_3 \cdot 9\text{H}_2\text{O}$  and the other metal salts were provided from Shanghai Fourth Chemical Reagent Company (China). Stock solution ( $2 \times 10^{-2}$  M) of the aqueous nitrate salts of  $\text{Li}^+$ ,  $\text{Na}^+$ ,  $\text{K}^+$ ,  $\text{Mg}^{2+}$ ,  $\text{Ca}^{2+}$ ,  $\text{Sr}^{2+}$ ,  $\text{Ba}^{2+}$ ,  $\text{Co}^{2+}$ ,  $\text{Ni}^{2+}$ ,  $\text{Cu}^{2+}$ ,  $\text{Mn}^{2+}$ ,  $\text{Zn}^{2+}$ ,  $\text{Cd}^{2+}$ ,  $\text{Ag}^+$ ,  $\text{Hg}^{2+}$ ,  $\text{Pb}^{2+}$ ,  $\text{Al}^{3+}$ ,  $\text{Cr}^{3+}$ ,  $\text{Fe}^{3+}$  and ferrous sulfate were prepared for further experiments. The elemental analyses of C, H and N were performed on a Vario EL III elemental analyzer. X-Ray powder diffraction (XRD) patterns of the Eu-BPDA and relative immersed compounds were recorded on a Rigaku D/max-2400 X-ray powder diffractometer (Japan) using  $\text{Cu-K}\alpha$  ( $\lambda = 1.5405 \text{ \AA}$ ) radiation. Thermogravimetric analysis (TGA) was carried out at a ramp rate of  $5 \text{ }^\circ\text{C}/\text{min}$  in a nitrogen flow with a Mettler-Toledo TGA/SDTA851 instrument. FT-IR spectra were recorded as KBr pellets on Bruker Optics TENSOR 27 FT-IR spectrophotometer. The  $\text{Eu}^{3+}$  content before or after treated with  $\text{Fe}^{3+}$  in water were measured by Inductively Coupled Plasma Spectrometer (Perkin Elmer). The solution fluorescent spectra were measured on Hitachi F-4600. Both excitation and emission slit widths were 2.5 nm. The Eu-BPDA emulsion was prepared by introducing 1 mg of Eu-BPDA powder into 3.00 mL of pure water, the intensity was recorded at 614 nm, excitation at 295 nm. For metal ions' detection, the high concentration of stock solutions of related metal ions ( $2.0 \times 10^{-2}$  M) were prepared directly in water solvents.

## 2. X-ray Crystallography (Single-crystal diffraction) and Characterizations.

### 2.1 Crystal data of Eu–BPDA:

$C_{21}H_{14}O_7Eu$ , Mr = 530.28, Monoclinic, space group  $C2/c$ ,  $a = 20.923(5)$ ,  $b = 21.410(5)$ ,  $c = 8.2496(19)$  Å,  $\alpha = 90.00$ ,  $\beta = 104.003(3)$ ,  $\gamma = 90.00$ ,  $V = 3585.8(14)$  Å<sup>3</sup>,  $Z = 8$ ,  $D_c = 1.965$  g cm<sup>-3</sup>,  $\mu(\text{Mo-K}\alpha) = 0.71073$  mm<sup>-1</sup>,  $T = 153(2)$  K. 8745 unique reflections [ $R_{\text{int}} = 0.0264$ ]. Final  $R_I$ [with  $I > 2\sigma(I)$ ] = 0.0240,  $wR_2(\text{all data}) = 0.0653$ , GOOF = 0.987. CCDC number: 1035886.

### 2.2 Crystallography:

Intensities were collected on a Bruker SMART APEX CCD diffractometer with graphite-monochromated Mo-K $\alpha$  ( $\lambda = 0.71073$  Å) using the SMART and SAINT programs. The structure was solved by direct methods and refined on  $F^2$  by full-matrix least-squares methods with SHELXTL version 5.1. Non-hydrogen atoms of the ligand backbones were refined anisotropically. Hydrogen atoms within the ligand backbones were fixed geometrically at calculated positions and allowed to ride on the parent non-hydrogen atoms.

**2.3 Figure S1** (a) The constitutive/constructional fragments composed of H<sub>2</sub>BPDA and Eu<sup>III</sup> ion along  $b$  direction. (b) Coordination polyhedron of the Eu<sup>III</sup> ion in the structure of Eu–BPDA. Symmetry codes: A:  $-x, y, 0.5-z$ ; B:  $x, y, 1+z$ ; C:  $x, y, -1+z$ ; D:  $-x, y, 1.5-z$ .

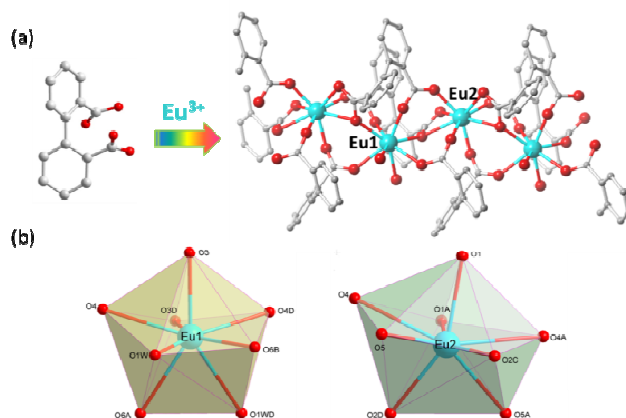

## 2.4 Selective bond distance (Å) and angle (°) in Eu-BPDA.

---

|                   |           |                    |           |
|-------------------|-----------|--------------------|-----------|
| Eu(1)–O(3D)       | 2.291(2)  | Eu(1)–O(6B)        | 2.469(2)  |
| Eu(1)–O(3)        | 2.291(2)  | Eu(1)–O(6)         | 2.469(2)  |
| Eu(1)–O(4D)       | 2.459(2)  | Eu(1)–O(1W)        | 2.507(3)  |
| Eu(1)–O(4)        | 2.459(2)  | Eu(1)–O(1WD)       | 2.507(3)  |
| Eu(2)–O(1)        | 2.313(2)  | Eu(2)–O(5)         | 2.415(3)  |
| Eu(2)–O(1A)       | 2.313(2)  | Eu(2)–O(5A)        | 2.415(3)  |
| Eu(2)–O(2C)       | 2.319(2)  | Eu(2)–O(4)         | 2.609(2)  |
| Eu(2)–O(2D)       | 2.319(2)  | Eu(2)–O(4A)        | 2.609(2)  |
| O(3D)–Eu(1)–O(3)  | 86.76(13) | O(6B)–Eu(1)–O(6)   | 108.12(1) |
| O(3D)–Eu(1)–O(4)  | 78.31(9)  | O(3D)–Eu(1)–O(1W)  | 147.07(9) |
| O(3)–Eu(1)–O(4)   | 71.99(8)  | O(3)–Eu(1)–O(1W)   | 93.61(1)  |
| O(3D)–Eu(1)–O(4D) | 71.99(8)  | O(4)–Eu(1)–O(1W)   | 70.60(9)  |
| O(3)–Eu(1)–O(4D)  | 78.31(9)  | O(4D)–Eu(1)–O(1W)  | 140.29(9) |
| O(4)–Eu(1)–O(4D)  | 138.76(1) | O(6B)–Eu(1)–O(1W)  | 66.89(9)  |
| O(3D)–Eu(1)–O(6B) | 146.04(9) | O(6)–Eu(1)–O(1W)   | 70.35(1)  |
| O(3)–Eu(1)–O(6B)  | 91.36(9)  | O(3D)–Eu(1)–O(1WD) | 93.61(1)  |
| O(4)–Eu(1)–O(6B)  | 132.98(9) | O(3)–Eu(1)–O(1WD)  | 147.07(9) |
| O(4D)–Eu(1)–O(6B) | 74.43(8)  | O(4)–Eu(1)–O(1WD)  | 140.29(8) |
| O(3D)–Eu(1)–O(6)  | 91.36(9)  | O(4D)–Eu(1)–O(1WD) | 70.60(9)  |
| O(3)–Eu(1)–O(6)   | 146.04(9) | O(6B)–Eu(1)–O(1WD) | 70.35(1)  |
| O(4)–Eu(1)–O(6)   | 74.43(8)  | O(6)–Eu(1)–O(1WD)  | 66.89(9)  |
| O(4D)–Eu(1)–O(6)  | 132.98(9) | O(1W)–Eu(1)–O(1WD) | 103.26(2) |
| O(1)–Eu(2)–O(1A)  | 80.48(1)  | O(5A)–Eu(2)–O(5)   | 135.61(1) |

---

---

|                   |           |                   |           |
|-------------------|-----------|-------------------|-----------|
| O(1)–Eu(2)–O(2C)  | 87.57(9)  | O(1)–Eu(2)–O(4)   | 73.69(9)  |
| O(1A)–Eu(2)–O(2C) | 150.56(9) | O(1A)–Eu(2)–O(4)  | 77.52(8)  |
| O(1)–Eu(2)–O(2C)  | 150.56(9) | O(2C)–Eu(2)–O(4)  | 124.73(9) |
| O(1A)–Eu(2)–O(2D) | 87.57(9)  | O(2D)–Eu(2)–O(4)  | 77.50(8)  |
| O(2C)–Eu(2)–O(2D) | 114.27(1) | O(5A)–Eu(2)–O(4)  | 150.05(9) |
| O(1)–Eu(2)–O(5A)  | 129.10(9) | O(5)–Eu(2)–O(4)   | 51.64(8)  |
| O(1A)–Eu(2)–O(5A) | 86.91(9)  | O(1)–Eu(2)–O(4A)  | 77.52(8)  |
| O(2C)–Eu(2)–O(5A) | 79.92(1)  | O(1A)–Eu(2)–O(4A) | 73.69(9)  |
| O(2D)–Eu(2)–O(5A) | 76.41(9)  | O(2C)–Eu(2)–O(4A) | 77.50(8)  |
| O(1)–Eu(2)–O(5)   | 86.91(9)  | O(2D)–Eu(2)–O(4A) | 124.73(9) |
| O(1A)–Eu(2)–O(5)  | 129.10(9) | O(5A)–Eu(2)–O(4A) | 51.64(8)  |
| O(2C)–Eu(2)–O(5)  | 76.41(9)  | O(5)–Eu(2)–O(4A)  | 150.05(9) |
| O(2D)–Eu(2)–O(5)  | 79.92(1)  | O(4)–Eu(2)–O(4A)  | 142.01(1) |

Symmetry code A:  $-x, y, 0.5-z$ ; B:  $x, y, 1+z$ ; C:  $-x, y, -1+z$ ; D:  $-x, y, 1.5-z$ .

---

**2.4 Figure S2** TGA traces of Eu-BPDA ranging from room temperature to 500 °C.

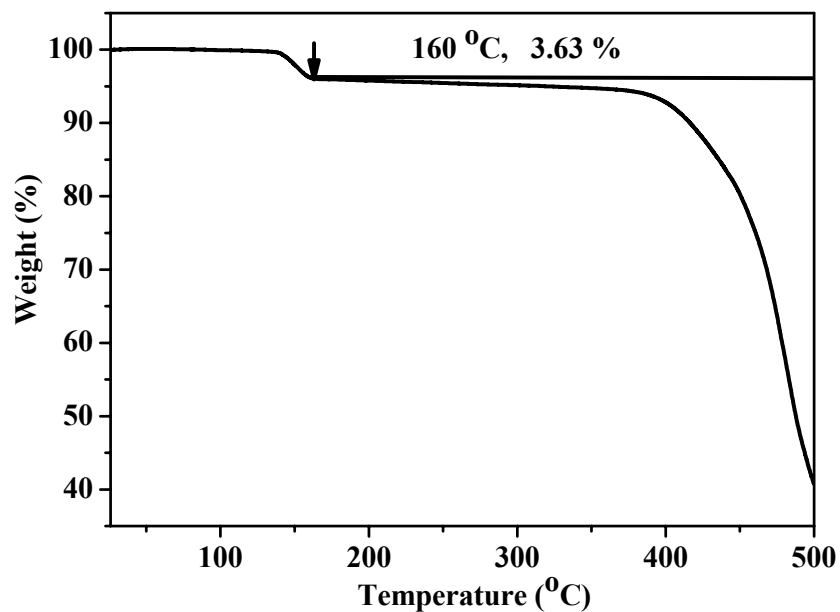

**2.5 Figure S3** Powder XRD patterns of Eu-BPDA simulated from single-crystal X-ray diffraction results, the as-synthesized Eu-BPDA and Eu-BPDA treated with acetone and water.

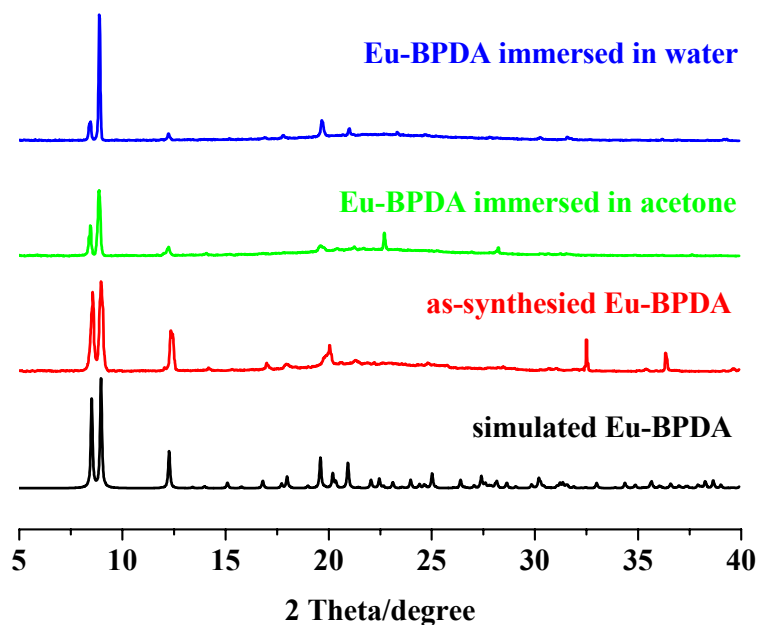

### 3. Recognition properties for small molecules based on Eu-BPDA.

#### 3.1 Figure S4 The UV/vis absorption spectra for solid Eu-BPDA.

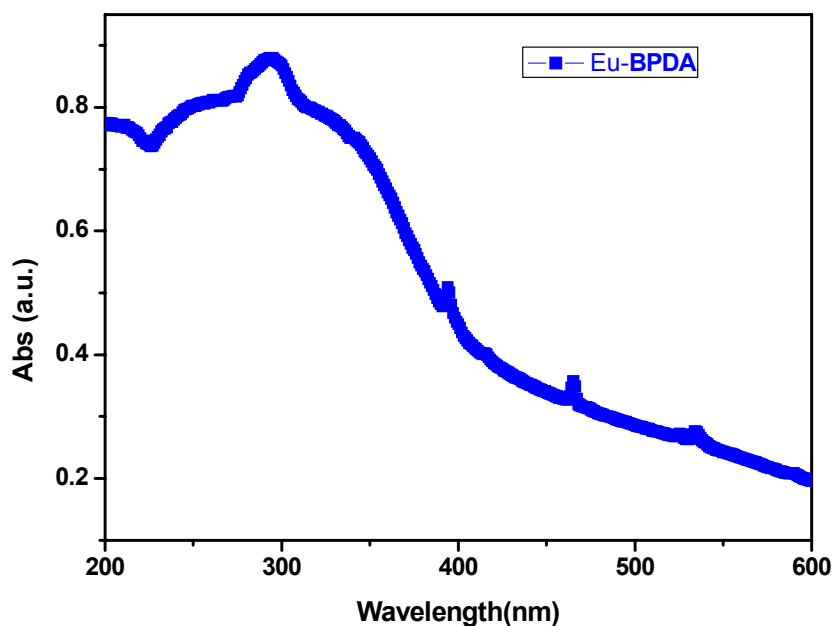

#### 3.2 Figure S5 The fluorescence spectra of Eu-BPDA in methanol solvent when excited at 295 nm.

The inset picture shows the two main bands arising from transitions from the emissive  $^5D_0$  level to the  $^7F_{1-4}$  levels of the ground states respectively.

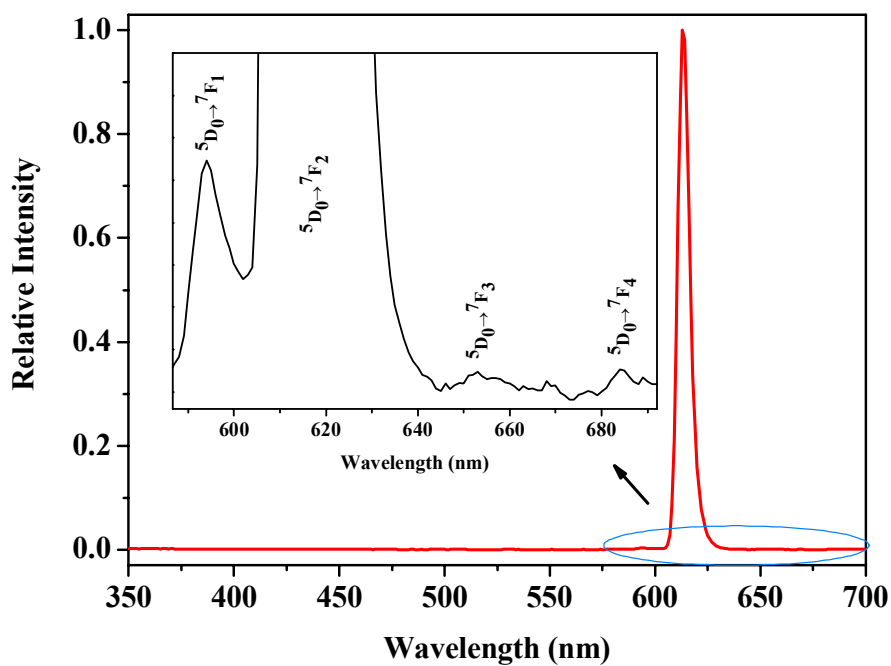

**3.3 Figure S6** The fluorescence spectra of Eu-BPDA in various pure solvents when excited at 295 nm.

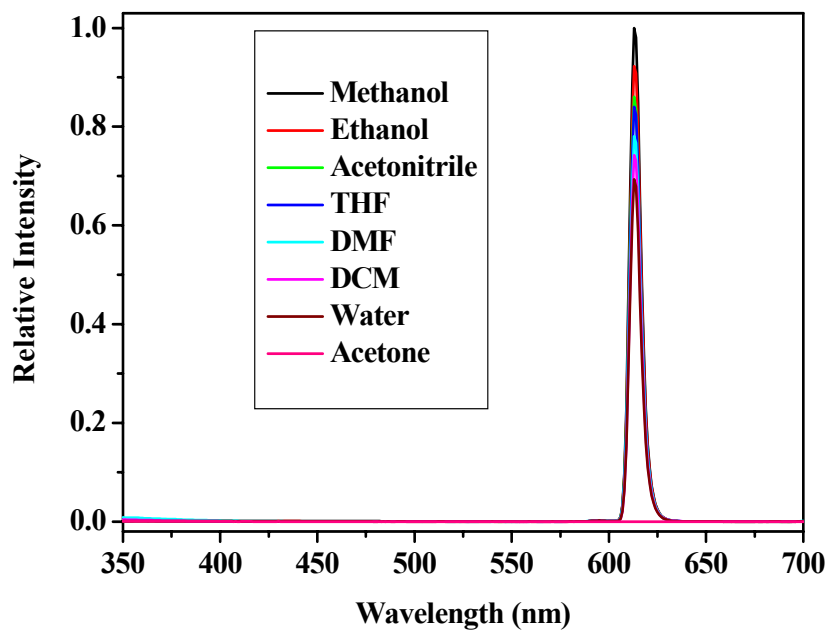

**3.4 Figure S7** The fluorescence spectra of Eu-BPDA methanol emulsion as a function of acetone content.

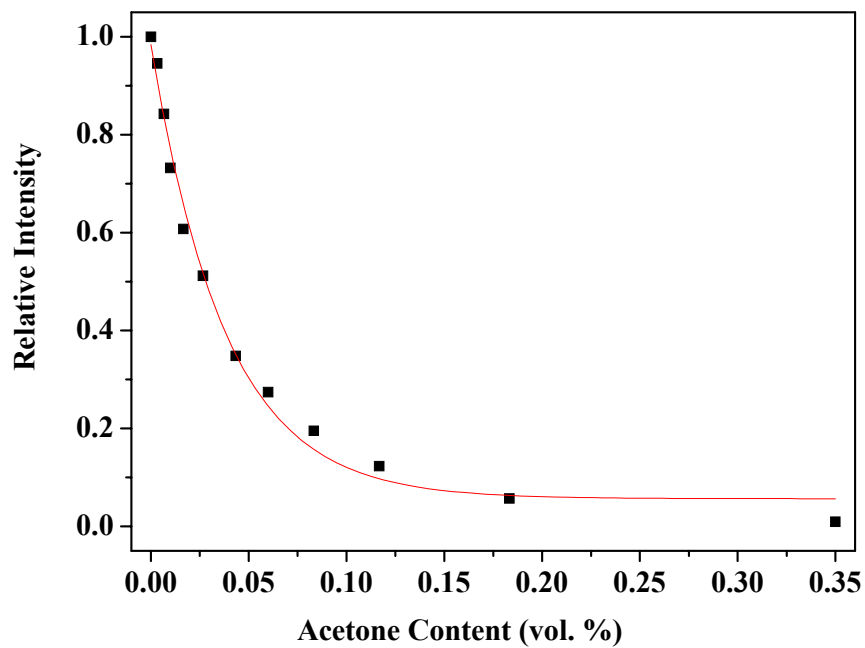



**3.5 Figure S8** FT-IR spectra of Eu-BPDA and Eu-BPDA after immersed in acetone.

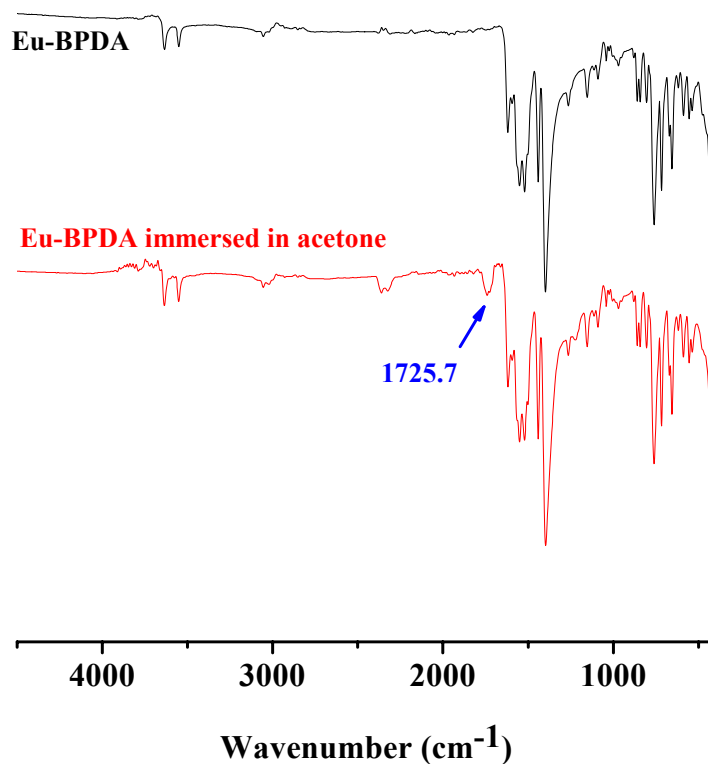

**3.6 Figure S9** Study on recycling of Eu-BPDA for the fluorescence sensing of acetone in methanol solvent when excited at 295 nm.

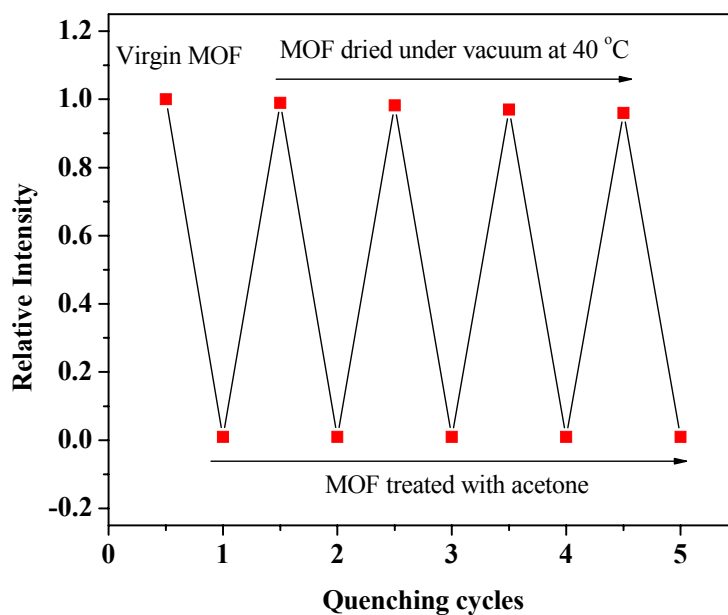

## 4. Recognition properties for metal ions based on Eu-BPDA

4.1 **Figure S10** Family of fluorescence spectra of Eu-BPDA (0.6 mM) in water solution upon the addition of 1.8 mM of various metal ions.

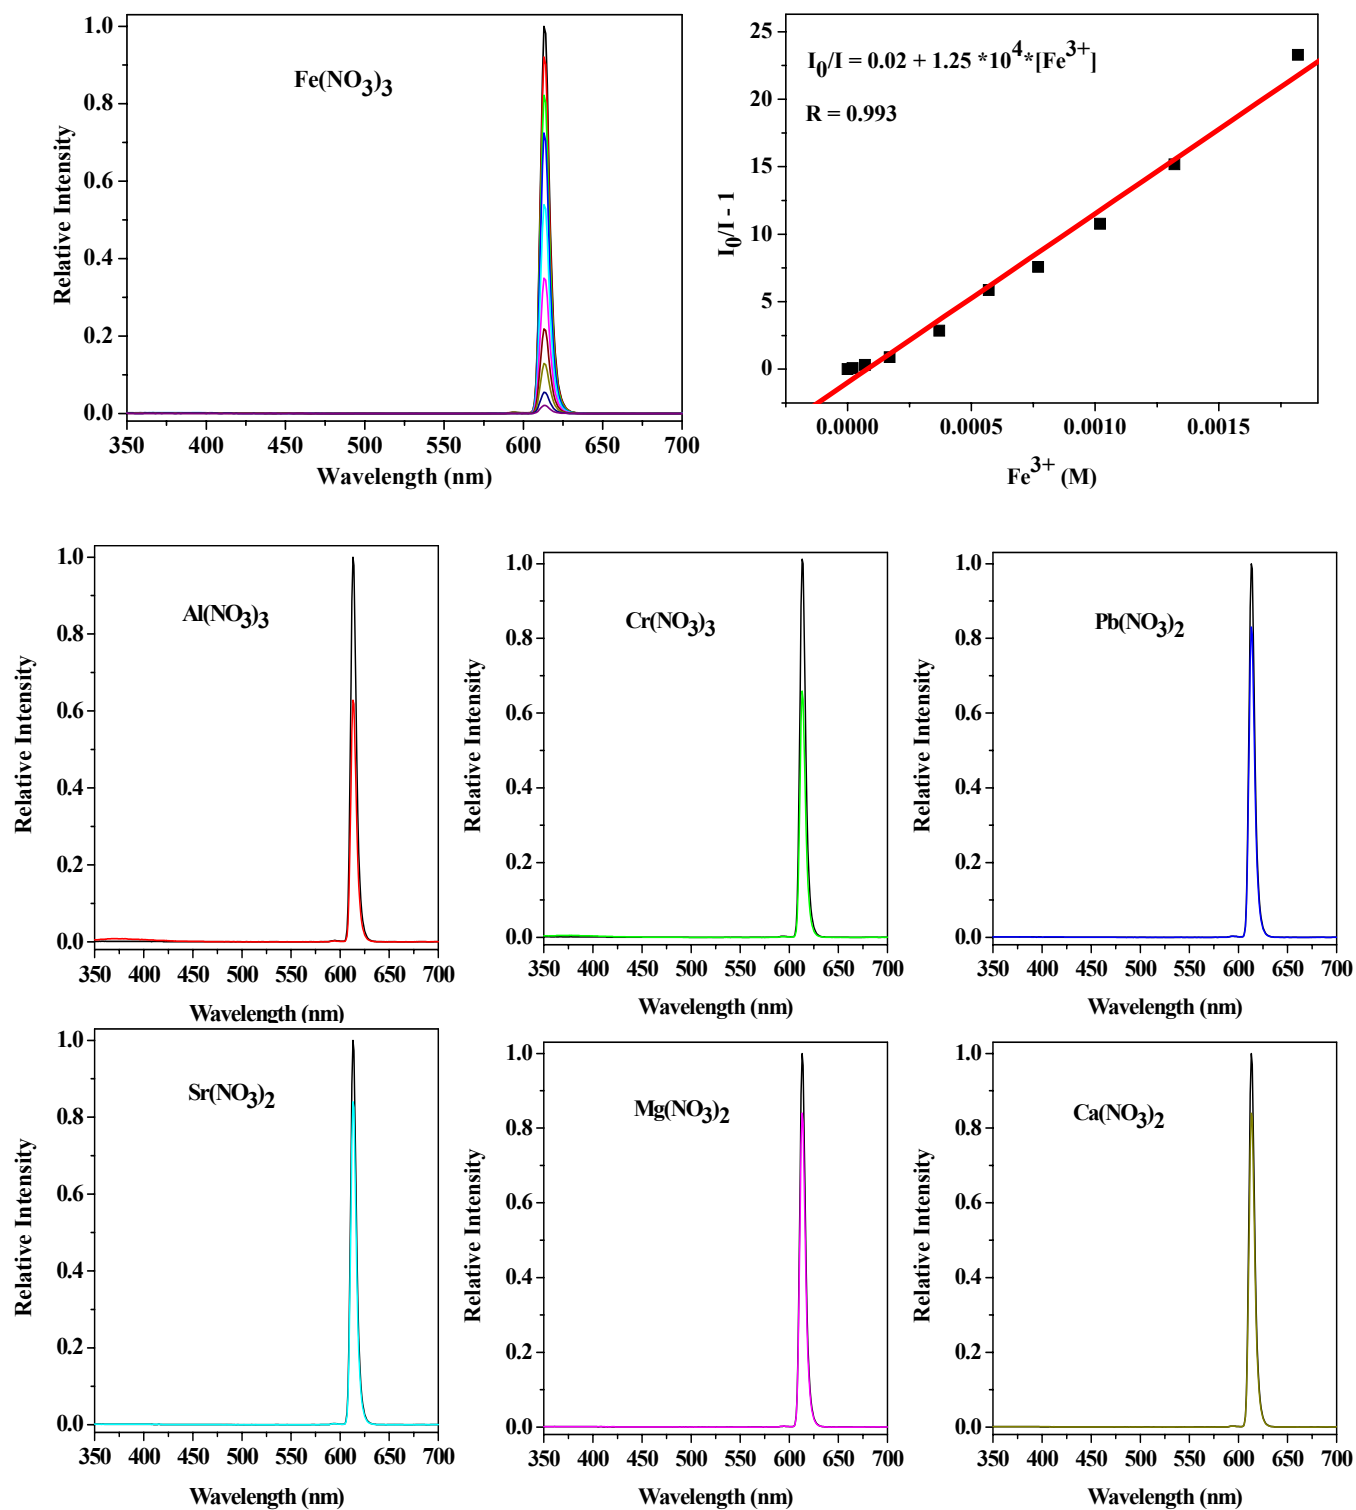

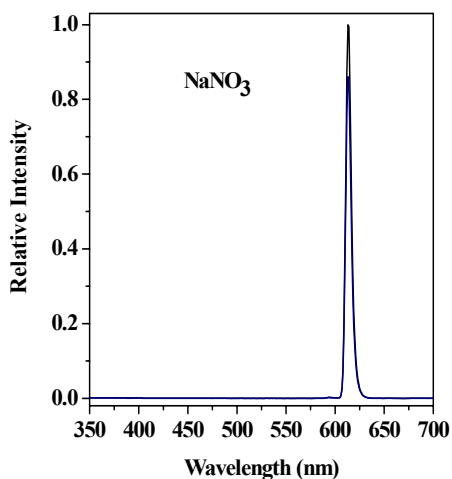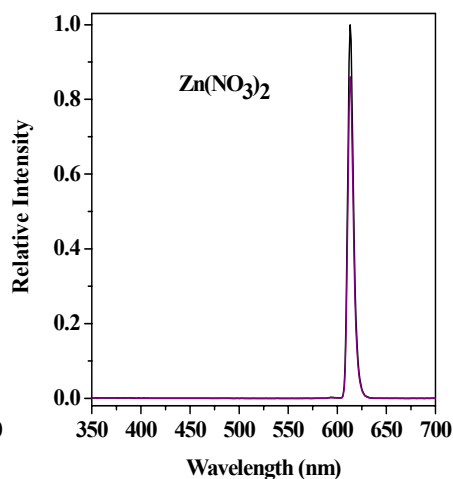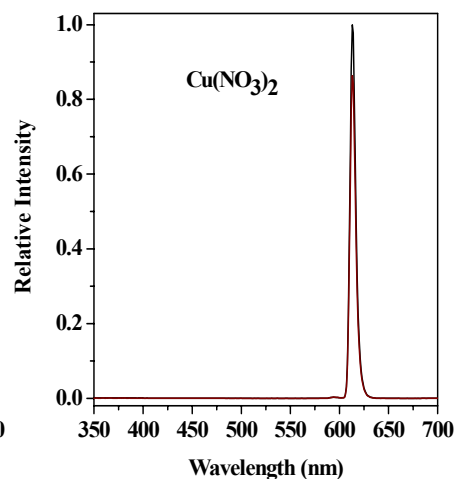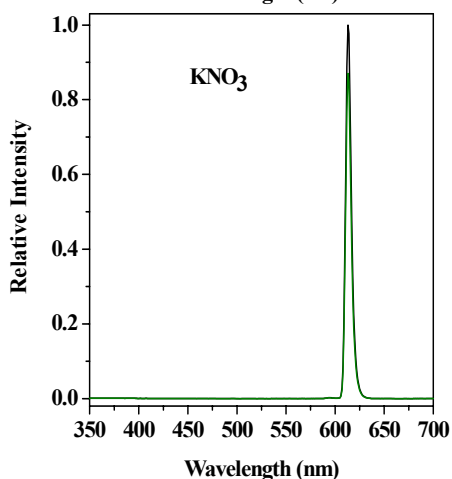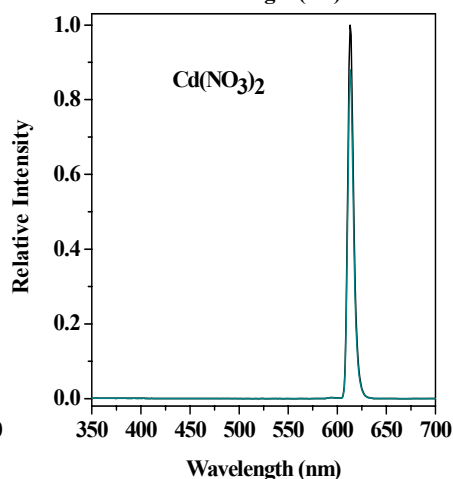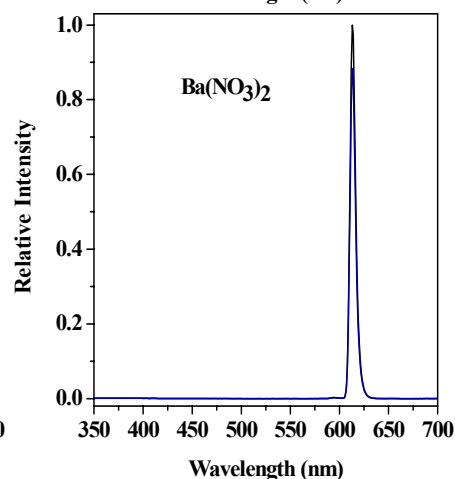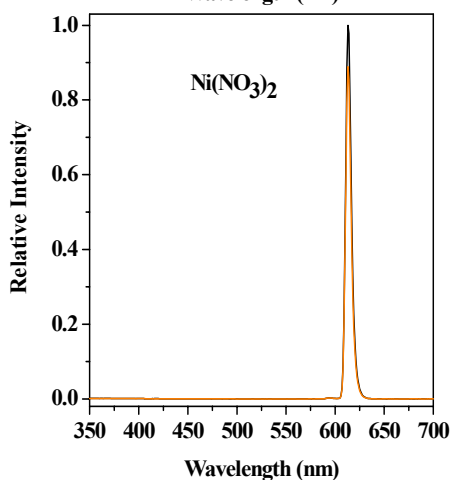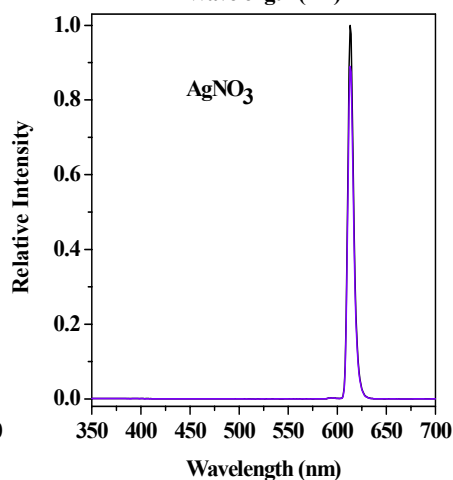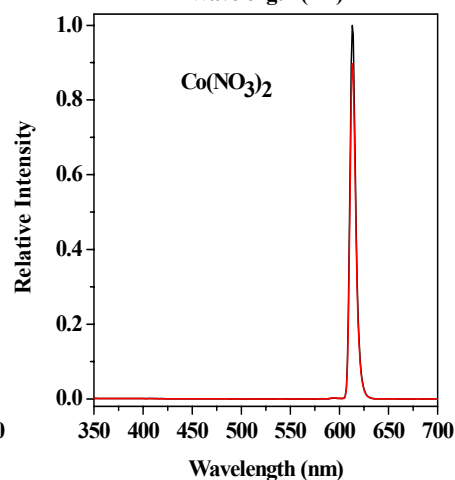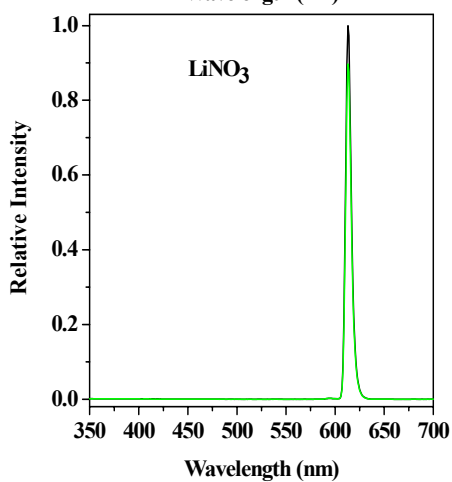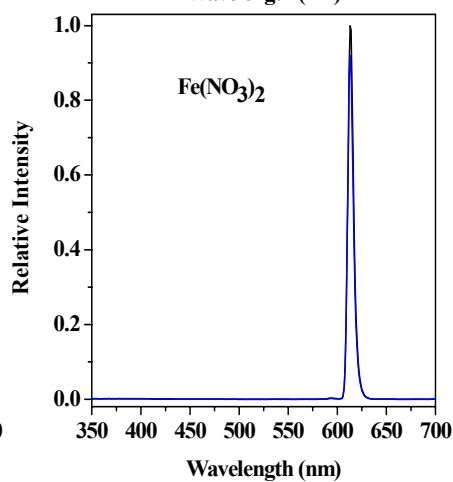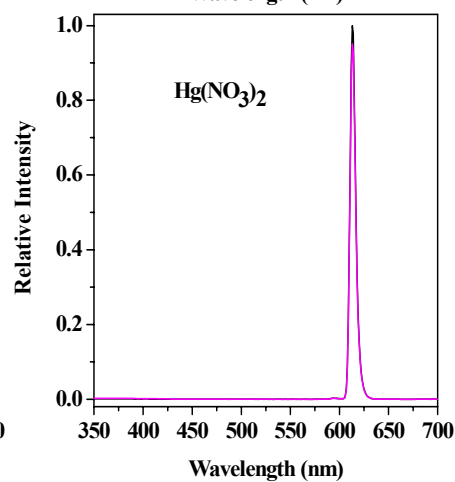

Supplement: c6nj02163h1.pdf [file c6nj02163h1.pdf]
